# Supplementary material
Source: publisher figshare collection journal article supplement (https://acs.figshare.com/ndownloader/files/20205798)
Supplement: Supplementary file 1 [file 20205798]

## Supporting Information

# **Charge Compensating Defects in Methylammonium Lead Iodide Perovskite Suppressed by Formamidinium Inclusion**

Niraj Shrestha, Zhaoning Song, Cong Chen, Ebin Bastola, Xiaoming Wang, Yanfa Yan and Randy J. Ellingson\*

Department of Physics and Astronomy, Wright Center for Photovoltaics Innovation and Commercialization, University of Toledo, Toledo, OH, USA 43606

\*Corresponding Author: [randy.ellingson@utoledo.edu](mailto:randy.ellingson@utoledo.edu)

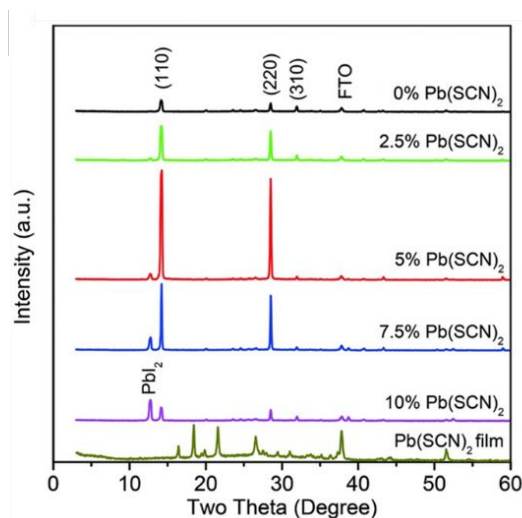

**Figure S1.** XRD patterns of  $\text{Pb}(\text{SCN})_2$  film and  $\text{MAPbI}_3$  films with various concentration of  $\text{Pb}(\text{SCN})_2$  in the precursors coated on FTO substrates. Adapted from Ref. 1 with permission, copyright 2016Wiley-VCH.

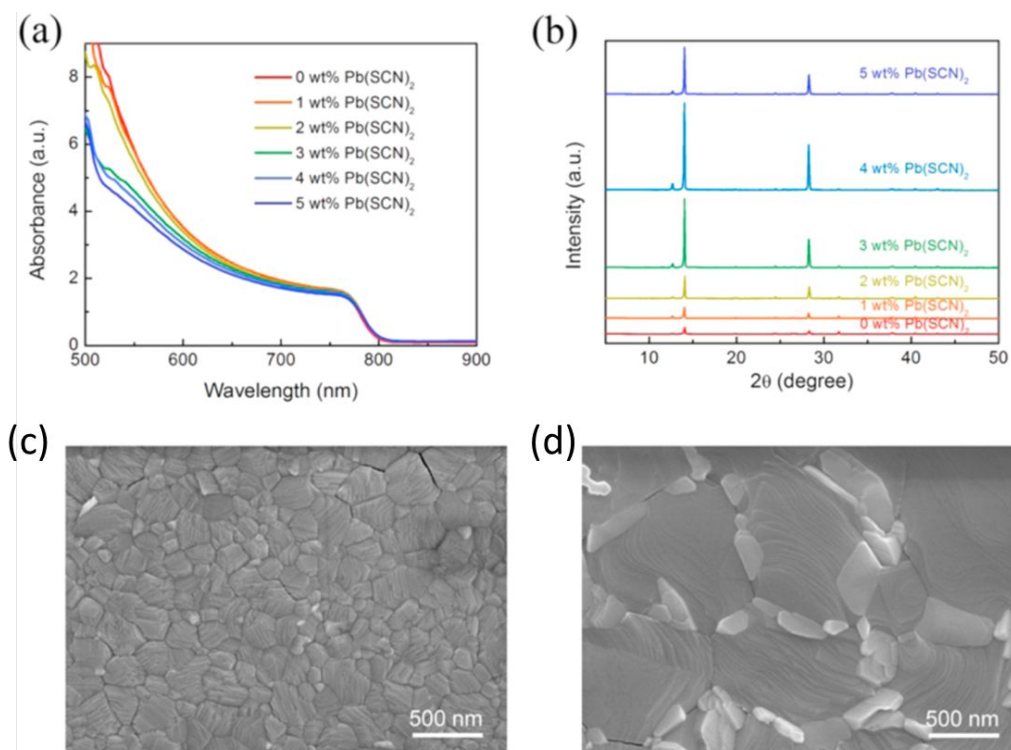

**Figure S2.** Characterizations of  $\text{MA}_{0.7}\text{FA}_{0.3}\text{PbI}_3$  films with various content of  $\text{Pb}(\text{SCN})_2$  additive. (a) UV-vis spectra, (b) XRD patterns of  $\text{MA}_{0.7}\text{FA}_{0.3}\text{PbI}_3$  films with various content of  $\text{Pb}(\text{SCN})_2$  additive. SEM images of (c)  $\text{MA}_{0.7}\text{FA}_{0.3}\text{PbI}_3$  and (d)  $\text{MA}_{0.7}\text{FA}_{0.3}\text{PbI}_3$  + 3 wt%  $\text{Pb}(\text{SCN})_2$  films. Adapted from Ref. 2 with permission, copyright 2017 Elsevier.

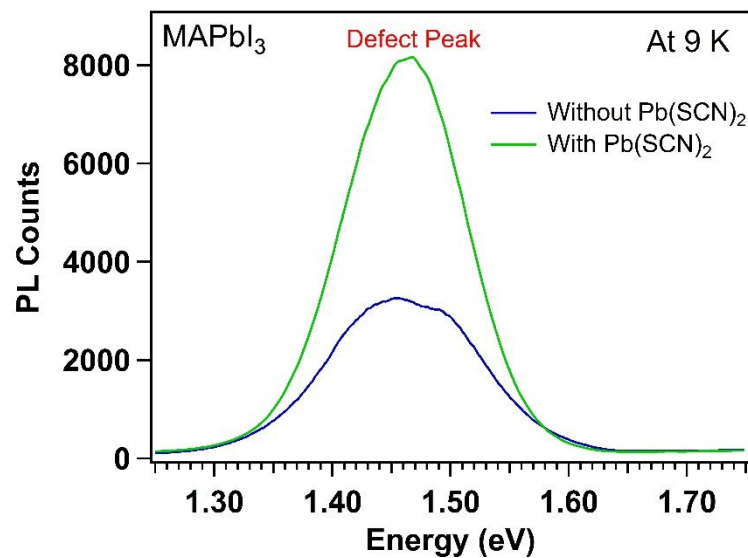

**Figure S3.** PL Spectra of MAPbI<sub>3</sub> films at 9 K with and without Pb(SCN)<sub>2</sub> additive.

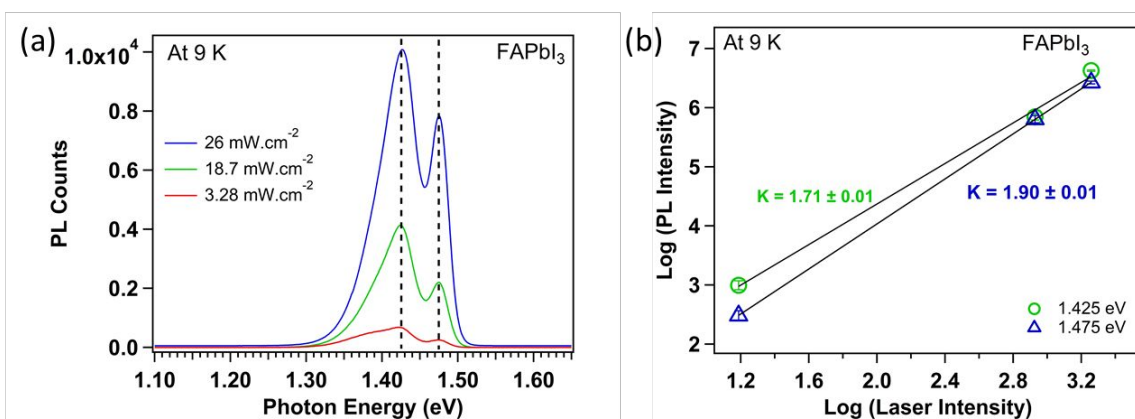

**Figure S4.** (a) PL spectra of FAPbI<sub>3</sub> at various laser intensities and (b) PL intensity vs. laser intensity.

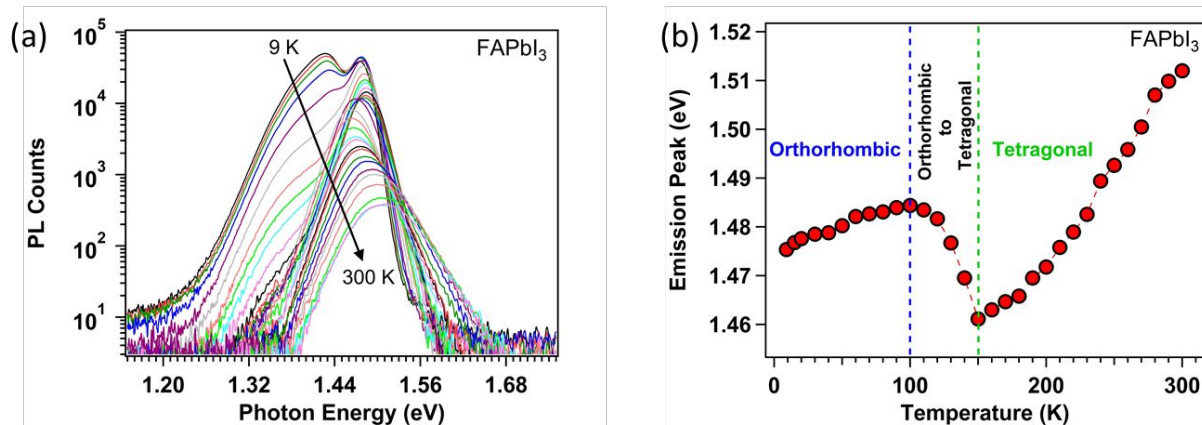

**Figure S5.** (a) Evolution of exciton peak of FAPbI<sub>3</sub> at various temperatures and (b) different phases in FAPbI<sub>3</sub> revealed by temperature dependent PL.

## References

- (1) Ke, W.; Xiao, C.; Wang, C.; Saparov, B.; Duan, H.-S.; Zhao, D.; Xiao, Z.; Schulz, P.; Harvey, S. P.; Liao, W. *et. al*, Employing Lead Thiocyanate Additive to Reduce the Hysteresis and Boost the Fill Factor of Planar Perovskite Solar Cells. *Advanced Materials* **2016**, 28 (26), 5214-5221.
- (2) Wang, C.; Zhao, D.; Yu, Y.; Shrestha, N.; Grice, C. R.; Liao, W.; Cimaroli, A. J.; Chen, J.; Ellingson, R. J.; Zhao, X. *et. al*, Compositional and Morphological Engineering of Mixed Cation Perovskite Films for Highly Efficient Planar and Flexible Solar Cells with Reduced Hysteresis. *Nano Energy* **2017**, 35, 223-232.
